# Supplementary material for: N/O coordinated s-block potassium atoms as highly active sites for electroreduction of CO2 to CO
Source: Royal Society of Chemistry journal article supplement (doi:10.1039/d4ta03780d), 2024-01-01
Supplement: d4ta03780d1.pdf [file d4ta03780d1.pdf]

## Supporting Information

### **N/O coordinated s-Block Potassium Atoms as High-Active Sites for Electroreduction of CO<sub>2</sub> to CO**

*Yafei Qu, Peichen Wang, Wei Zheng, Naiyuan Duan, Yang Yang, Tianxin Hou, Chenyang Bi, Dongdong Wang and Qianwang Chen\**

Hefei National Research Center for Physical Sciences at the Microscale and Department of Materials Science and Engineering, University of Science and Technology of China, Hefei 230026, China.

\*Corresponding author. Email address: [cqw@ustc.edu.cn](mailto:cqw@ustc.edu.cn)

This file includes:

Fig. S1 to S26  
Tables S1 to S4  
References

## Experimental section

### Materials and methods:

All reagents and chemicals that used in the synthesis of different materials are analytically pure (AR grade). Zinc nitrate hexahydrate ( $\text{Zn}(\text{NO}_3)_2 \cdot 6\text{H}_2\text{O}$ ,  $\geq 99.0\%$ ), Potassium chloride (KCl,  $\geq 99.5\%$ ), Potassium hydrogen carbonate ( $\text{KHCO}_3$ ,  $\geq 99.5\%$ ), Methanol ( $\text{CH}_3\text{OH}$ ,  $\geq 99.5\%$ ) and Ethanol ( $\text{C}_2\text{H}_5\text{OH}$ ,  $\geq 99.7\%$ ) were purchased from Sinopharm Chemical Reagent Co., Ltd. 2-Methylimidazole ( $\text{C}_4\text{H}_6\text{N}_2$  99%) was purchased from J&K Scientific. Nafion solution (Nafion 1100W, 5 wt.%) was purchased from Sigma-Aldrich. All chemicals were used as received without further purification.

### Preparation of catalysts

**Synthesis of ZIF-8 precursor:** 1.68 g  $\text{Zn}(\text{NO}_3)_2 \cdot 6\text{H}_2\text{O}$  and 4 g 2-methylimidazole were dissolved in 20 mL and 60 mL methanol, respectively. The two solutions were mixed and stirred for 1 h at room temperature and then left to rest for 24 h. The precipitate was centrifuged and washed with methanol several times and dried at  $60^\circ\text{C}$  under vacuum, denoted as ZIF-8.

**Synthesis of K-N, O/C catalysts:** A certain mass ratio of ZIF-8 precursors and KCl are mixed intensively in a mortar. Then the mixture is placed in a crucible and pyrolyzed at  $900^\circ\text{C}$  under Ar atmosphere for 3 h with a heating rate of  $5^\circ\text{C min}^{-1}$ , the product is labeled as K-N, O/C-pre. K-N, O/C-pre was leached by dilute HCl solution to remove the KCl and remaining Zn. Then, the precipitate was collected and washed with water for several times until its pH was close to 7 and dried in oven at  $60^\circ\text{C}$ . The acid pickling sample was conducted at  $900^\circ\text{C}$  under Ar atmosphere for 3 h with a heating rate of  $5^\circ\text{C min}^{-1}$  for a second pyrolysis to obtain the final product, denoted as K-N, O/C-m (m represents the mass ratio of ZIF-8 to KCl). The samples with different ratio are recorded as K-N, O/C-0.5, K-N, O/C-1.0, K-N, O/C-1.5, K-N, O/C-2.0.

**Synthesis of N, O/C:** As a control sample, ZIF-8 is pyrolyzed at  $900^\circ\text{C}$  under Ar atmosphere for 3 h with a heating rate of  $5^\circ\text{C min}^{-1}$  without adding KCl. The obtained carbon material is labelled as N, O/C.

**Synthesis of K-O/C:** 0.55 g  $\text{Zn}(\text{CH}_3\text{COO})_2 \cdot 2\text{H}_2\text{O}$  was dispersed in 10 mL aqueous solution to form solution A. 0.525 g of 1,3,5-benzenetricarboxylic acid was added into 70 mL ethanol to form solution B. Then, solutions of A and B were mixed and ultrasound for 20 min at room temperature. The precipitate was centrifuged and washed with water and ethanol several times and dried at  $60^\circ\text{C}$  under vacuum, denoted as ZnBTC. Replace ZIF8 with ZnBTC, the remaining method is the same as K-N, O/C, and the final product is denoted as K-O/C.

### Characterizations

SEM images were conducted on a Carl Zeiss Supra 40 scanning electron microscope (SEM). TEM images were collected from Hitachi H-7650 transmission electron microscope (TEM) using

an accelerating voltage of 200 kV. The powder X-ray diffraction patterns (XRD) of the samples were recorded with an X-ray diffractometer (Japan Rigaku D/MAX- $\gamma$ A) using Cu-K $\alpha$  radiation ( $\lambda=1.54178$  Å) with  $2\theta$  range of  $10^\circ$ – $80^\circ$ . High-resolution transmission electron microscopy (HRTEM), high-angle annular dark-field scanning transmission electron microscopy (HAADF-STEM) and energy-dispersive spectroscopy (EDS) mapping analyses were executed on a FEI Talos F200X operating at an accelerating voltage of 200 kV. The X-ray photoelectron spectra (XPS) were recorded on a Kratos Axis supra<sup>+</sup> spectrometer with an excitation source of monochromatized Al-K $\alpha$  ( $h\nu = 1486.6$  eV). The specific surface area was measured with the Brunauer-Emmett-Teller (BET) method using a Micromeritics Tristar II 3020 instrument. Inductively coupled plasma-atomic emission spectrometer (ICP-AES) were conducted with an iCAP 7400 instrument. Raman spectra were obtained using a Horiba LabRAM SoLeil Raman spectrometer. TGA Q5000IR was used for thermogravimetric analysis (TGA) with a heating rate of  $5$  °C  $\text{min}^{-1}$  in  $\text{N}_2$  atmosphere. The Fourier transform infrared (FT-IR) spectra were collected on a Nicolet iS50 FT-IR spectrometer.

### Electrochemical measurements

All the  $\text{CO}_2$ RR electrochemical measurements were conducted at  $25$  °C by an electrochemical workstation (CHI 660E) in a two-compartment batch cell (H-cell) containing  $30$  mL of  $0.5$  M  $\text{KHCO}_3$  solution. A platinum foil and an Ag/AgCl electrode were used as the counter and the reference electrodes, respectively. Typically,  $5$  mg of catalyst was dispersed in  $15$   $\mu\text{L}$  Nafion and  $485$   $\mu\text{L}$  ethanol solution and sonicated for  $10$  min to form a homogeneous ink. The working electrode was prepared by dropping  $50$   $\mu\text{L}$  ink onto  $1$   $\text{cm} \times 1$   $\text{cm}$  carbon paper electrode. Before all the electrochemical  $\text{CO}_2$  reduction tests, a flow high-purity  $\text{CO}_2$  with a flow rate of  $30$  sccm (standard cubic centimeter per minute) was purged into the  $\text{KHCO}_3$  for  $30$  min ( $\text{pH} = 7.2$ ). During the  $\text{CO}_2$ RR test, cyclic voltammetry (CV) measurements was performed for twelve circles with scan rate of  $100$   $\text{mV s}^{-1}$  under the potential range from  $-1.7$  V to  $0$  V. Linear sweep voltammetry (LSV) was conducted with scan rate of  $50$   $\text{mV s}^{-1}$ . Multiple potential step  $i$ - $t$  measurements with several selected potential was performed. All potentials were measured against an Ag/AgCl reference electrode and converted to RHE scale according to Nernst equation ( $E_{\text{RHE}} = E_{\text{Ag/AgCl}} + 0.059 \times \text{pH} + 0.197$ ).

### Detection and quantification of gas products

The gas produced during the reaction is continuously fed into the gas chromatography (Agilent 7890B) for the analysis of its composition at each potential. The Faradaic efficiency of the gas product was calculated by following equation <sup>1</sup>:

$$\text{Faradaic efficiency} = \frac{i_x}{i_{\text{total}}} = \frac{n_x \times v_{\text{gas}} \times c_x \times F}{i_{\text{total}} \times V_m}$$

where  $i_x$  is the partial current of product  $x$ ,  $i_{total}$  is the total current,  $n_x$  represents the number of electrons transferred towards the formation of 1 mol product  $x$ ,  $v_{gas}$  is the CO<sub>2</sub> flow rate (sccm),  $c_x$  represents the concentration of product  $x$  detected by gas chromatography (ppm),  $F$  is the Faraday constant (96,485 C mol<sup>-1</sup>), and  $V_m$  is the unit molar volume, which is 24.5 L mol<sup>-1</sup> at room temperature (298.15 K).

### ***In-situ* attenuated total refraction-infrared spectroscopy (ATR-IR)**

ATR-IR was carried out on a Nicolet iS50 FT-IR spectrometer equipped with an MCT detector cooled with liquid nitrogen. The Au-coated Si semi-cylindrical prism (20 mm in diameter) was used as the conductive substrate for catalysts and the IR reflection element. The catalysts suspensions were dropped on the Au/Si surface as the working electrode. A Pt-wire and an Ag/AgCl electrode were used as the counter and the reference electrodes, respectively. The electrolyte was 0.5 M KHCO<sub>3</sub>, which was constantly purged with CO<sub>2</sub> during the experiment. Chronoamperometry was used for CO<sub>2</sub>RR test and was accompanied by the spectrum collection. All spectra were recorded on CO<sub>2</sub>-saturated 0.5 M KHCO<sub>3</sub> by stepwise switching the potential from 0 V to -1.2 V vs. RHE. The spectrum collected at the open circuit voltage is used for the background subtraction.

### **Density functional theory (DFT) calculations**

The DFT calculations were carried out using the *Vienna Ab Initio Simulation Package* (VASP). This code solves the Kohn-Sham equations of density functional theory (DFT) using a plane-wave basis set and the projector augmented wave (PAW) method. The generalized gradient approximation (GGA) of Perdew-Becke-Ernzerhof (PBE) is used for the exchange-correlation functional<sup>2,3</sup>. The kinetic energy cut off is 400 eV for the plane-wave expansion of the electronic wave function, and the convergence criterion of the electronic self-consistent iteration and forces were set to be 10<sup>-5</sup> eV and 0.01 eV/Å. A Monkhorst-Pack 3×3×1 k-point grid was used for the structural relaxation. The lattice parameters are a= b=25 Å, c=20 Å, α= β=γ=90°.

The overall reaction pathways of CO<sub>2</sub> to CO processes can be described as follows:

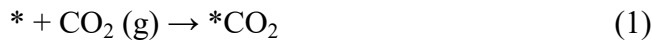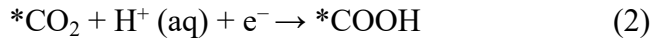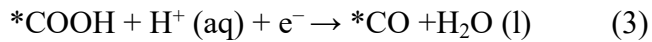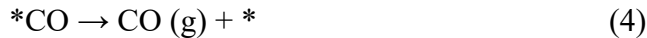

The Gibbs free energies were calculated as follows:

$$\Delta G = \Delta H - T\Delta S + \Delta G_{\text{pH}} + \Delta G_U = \Delta E + \Delta E_{\text{ZPE}} - T\Delta S + \Delta G_{\text{pH}} + \Delta G_U$$

$$\Delta G_{\text{pH}} = \text{pH} \times k_B T \ln 10$$

Where  $\Delta E$  is the energy difference between products and reactants from DFT calculations.  $\Delta E_{\text{ZPE}}$

is the difference in zero-point energy. And  $\Delta S$  is the change in entropy.  $T$  is the temperature (298.15 K).  $\Delta G_U = -eU$  is the contribution of electrode potential to  $\Delta G$ .  $k_B$  is the Boltzmann constant ( $1.38 \times 10^{-23} \text{ J K}^{-1}$ ).

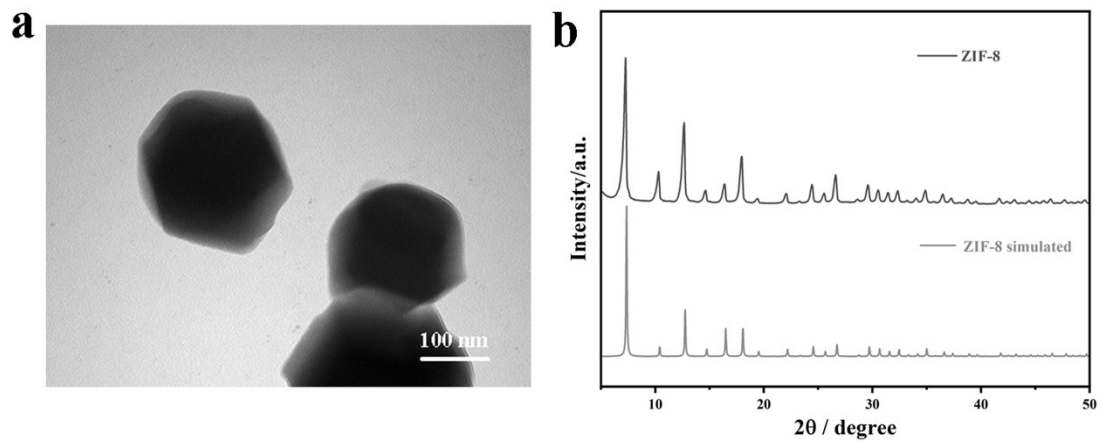

**Fig. S1** (a) TEM image of ZIF-8 precursor; (b) The XRD pattern of ZIF-8 precursor.

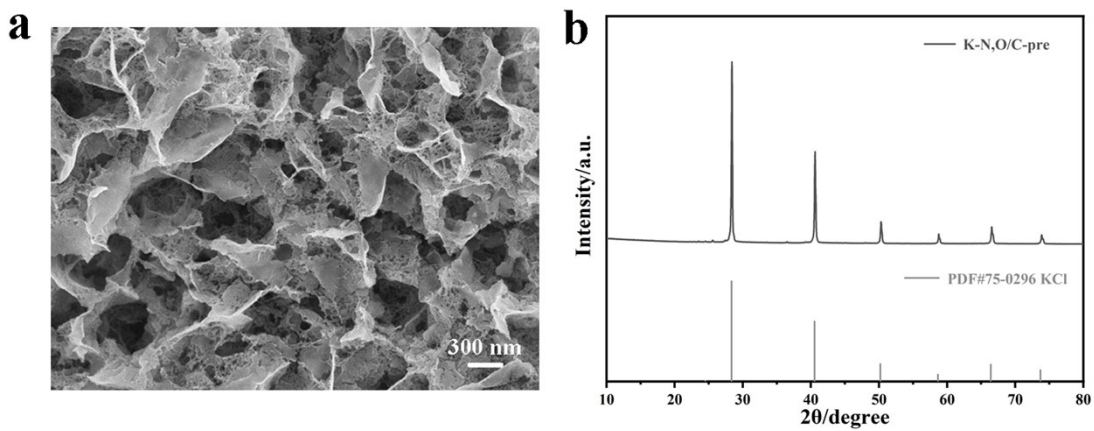

**Fig. S2** (a) TEM image of K-N, O/C-pre; (b) The XRD pattern of K-N, O/C-pre.

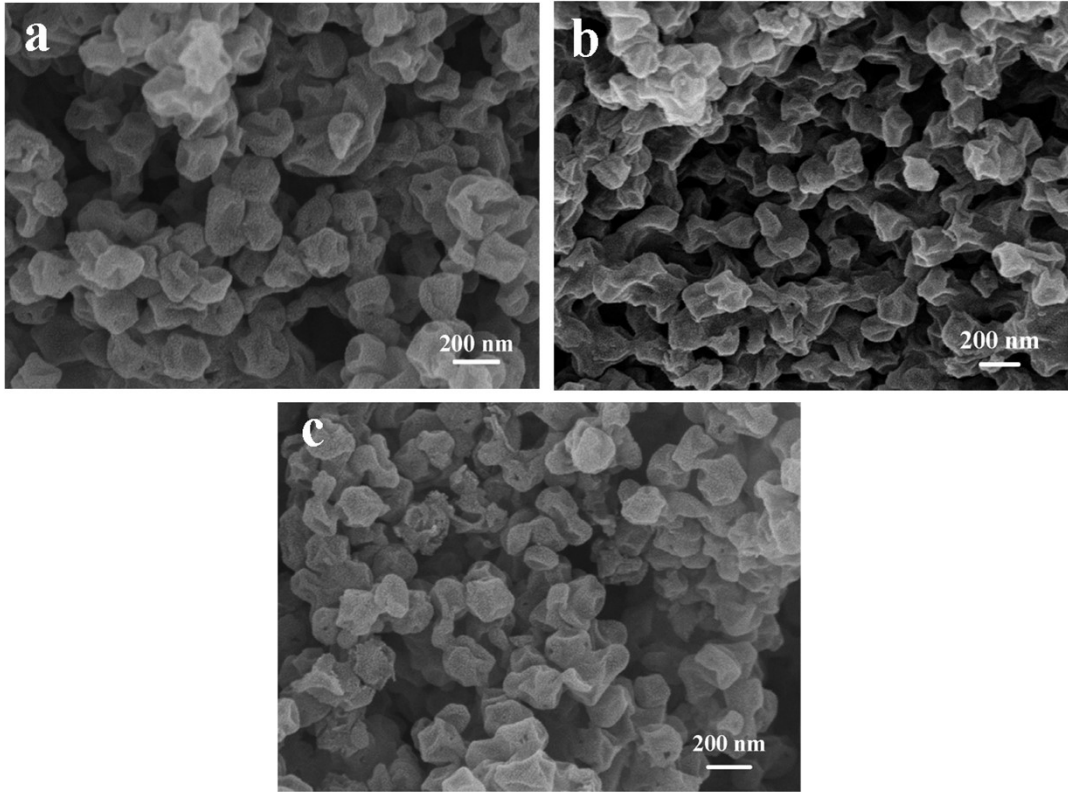

**Fig. S3** The SEM images of (a) K-N, O/C-0.5, (b) K-N, O/C-1 and (c) K-N, O/C-2.



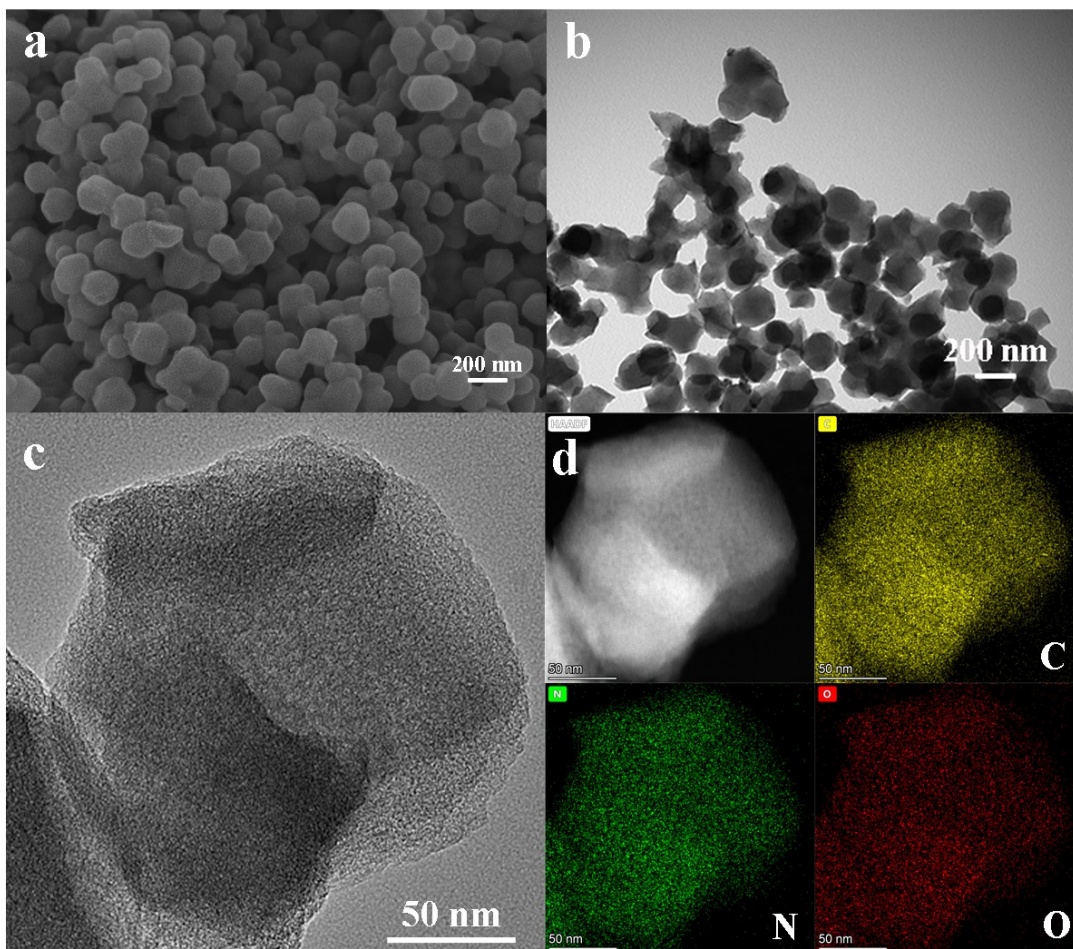

**Fig. S4** (a) The SEM images of N, O/C; (b) The TEM images of N, O/C; (c) HRTEM image of N, O/C; (d) HAADF image and elements mapping of N, O/C.

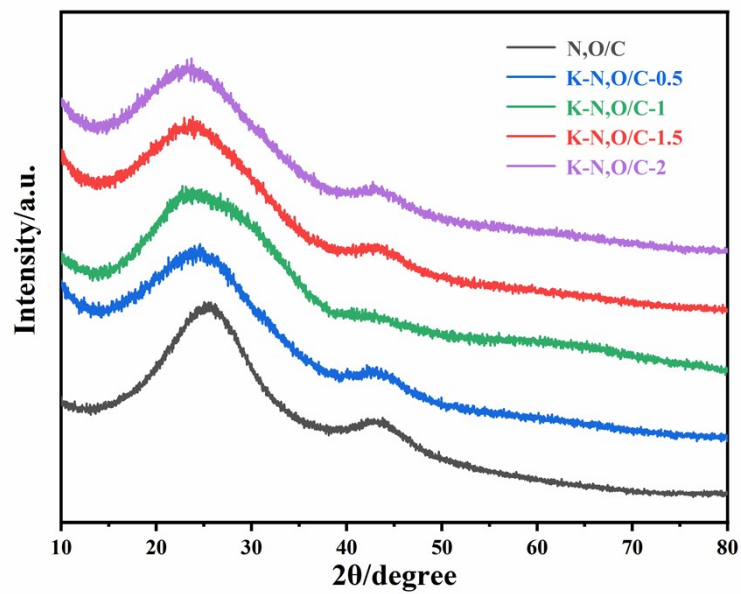

**Fig. S5** The XRD patterns of N, O/C, K-N, O/C-0.5, K-N, O/C-1, K-N, O/C-1.5 and K-N, O/C-2.

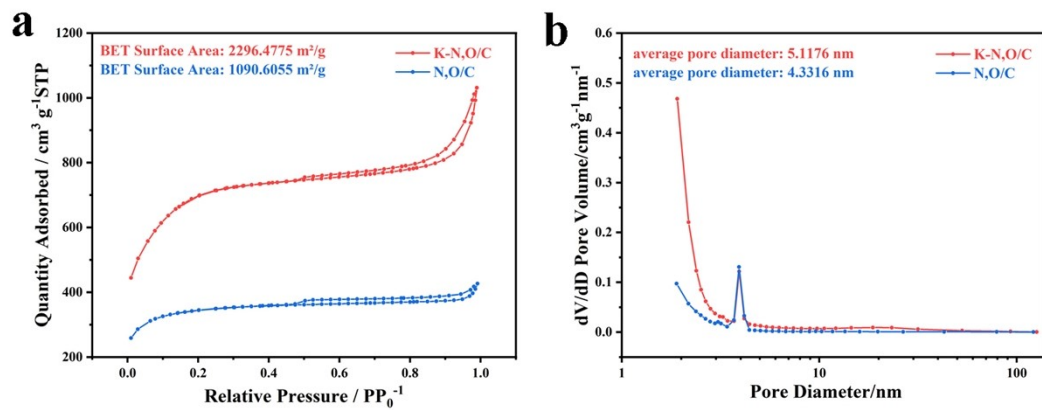

**Fig. S6** (a) N<sub>2</sub> adsorption/desorption plots of K–N, O/C and N, O/C catalysts; (b) Pore distribution of K–N, O/C and N, O/C catalysts.

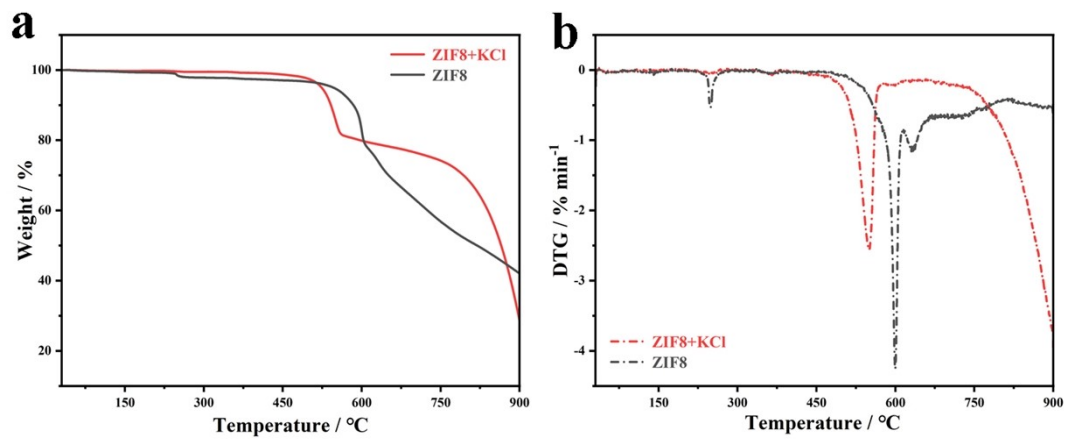

**Fig. S7** (a) TG and (b) DTG curves of ZIF-8/KCl under heated from 30 °C to 900 °C with a rate of 5 °C min<sup>-1</sup> under nitrogen atmosphere.

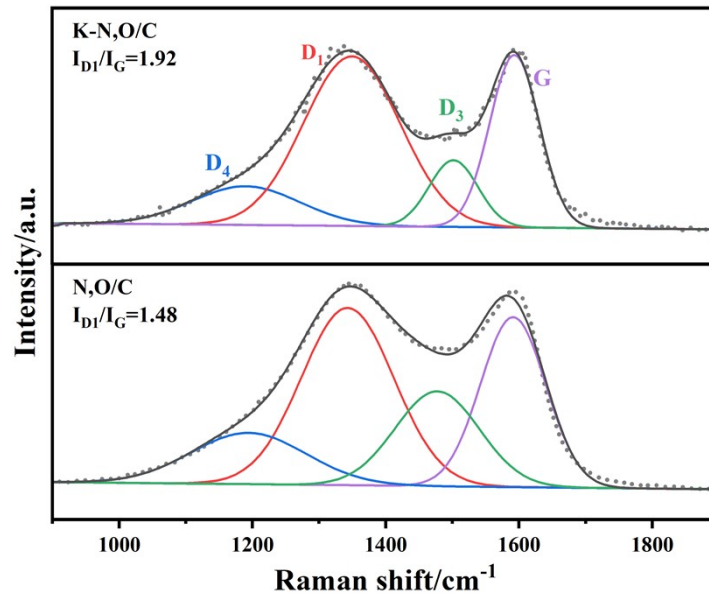

**Fig. S8** The Raman spectra of K–N, O/C and N, O/C.

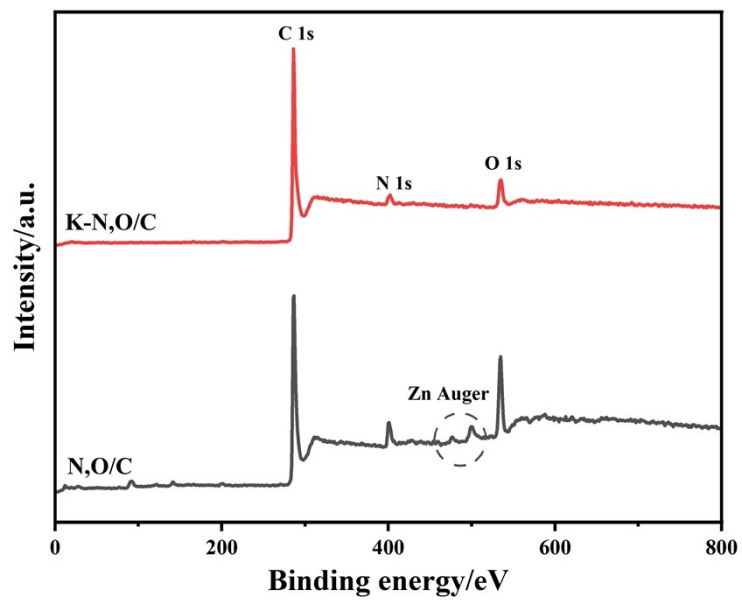

**Fig. S9** The XPS survey spectrum of K-N, O/C and N, O/C.

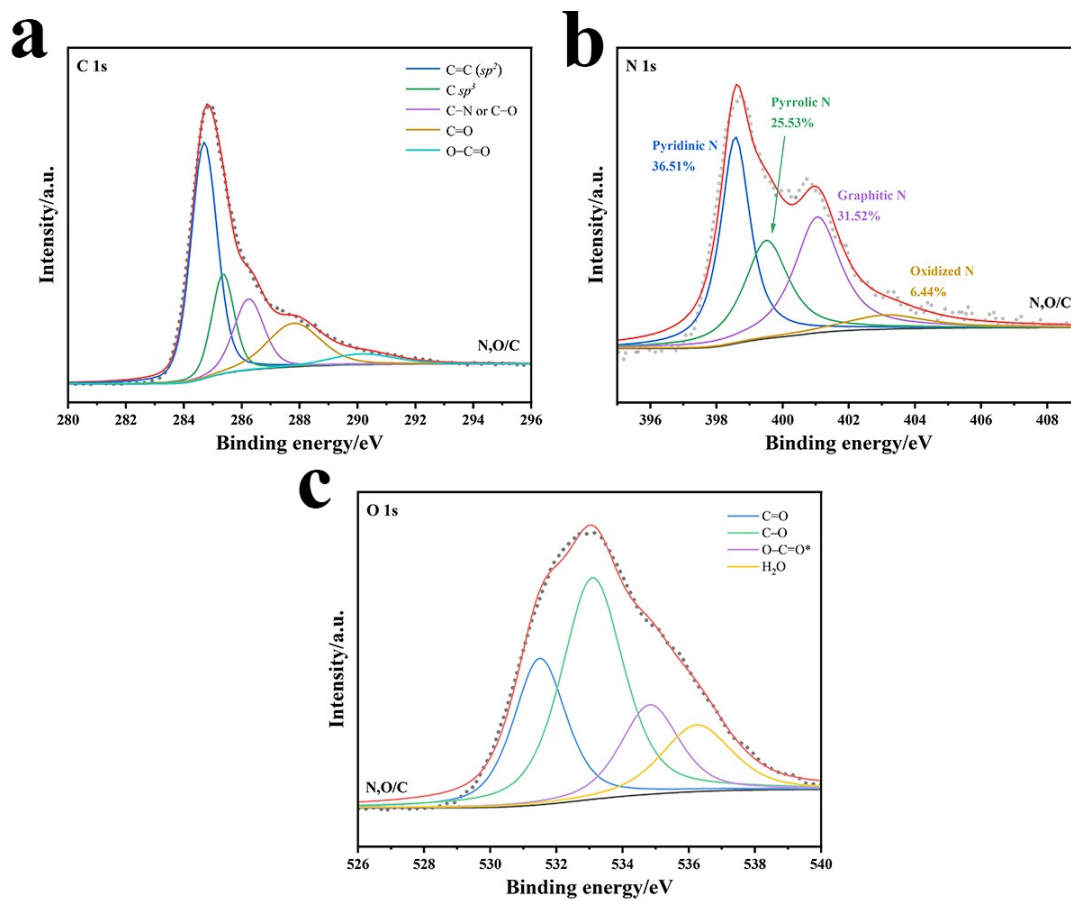

**Fig. S10** High-resolution XPS (a) C 1s spectra, (b) N 1s spectra and (c) O 1s spectra of N, O/C.

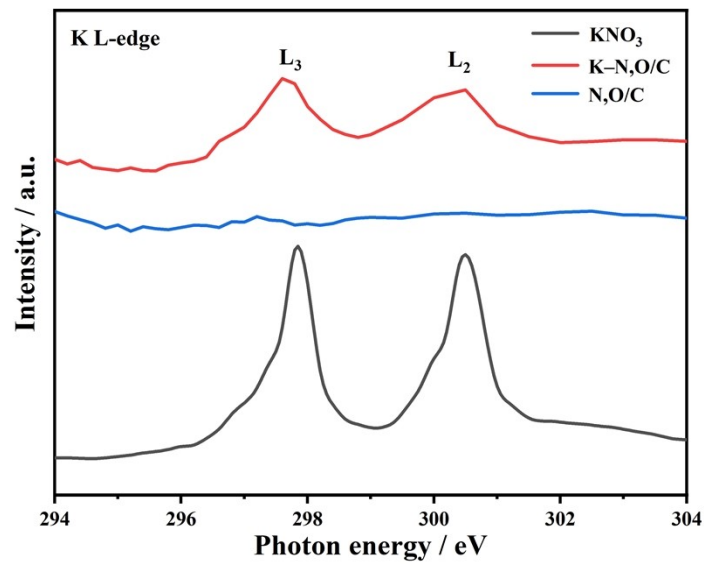

**Fig. S11** K L-edge XANES spectra for K-N, O/C and KNO<sub>3</sub>.



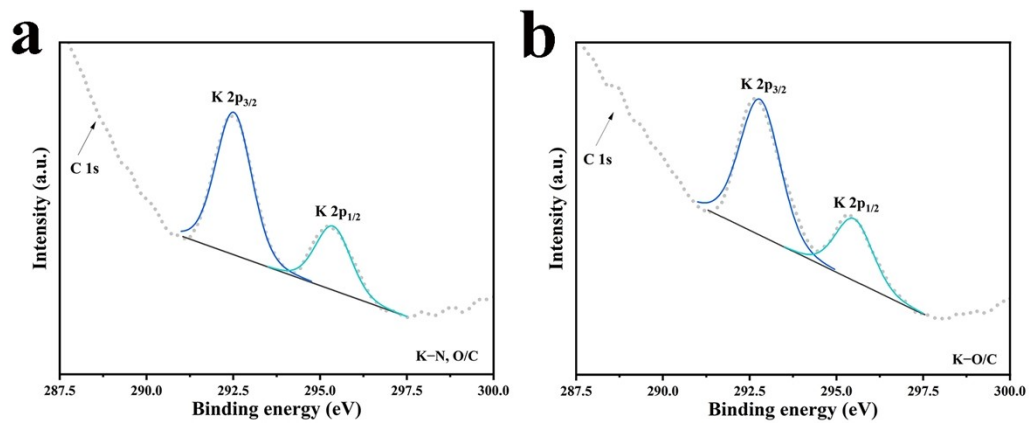

**Fig. S12** The high-resolution XPS spectra of K 2p for (a) K-N, O/C and (b) K-O/C.

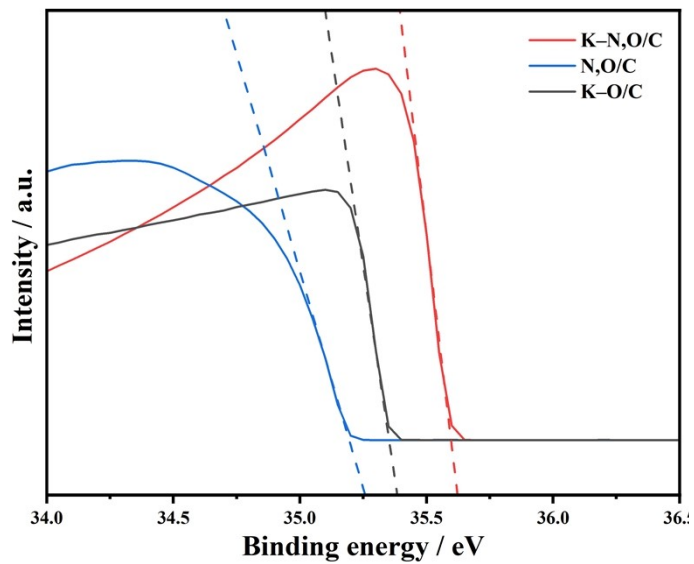

**Fig. S13** work function determined by UPS measurements N, O/C, K-O/C and K-N, O/C.

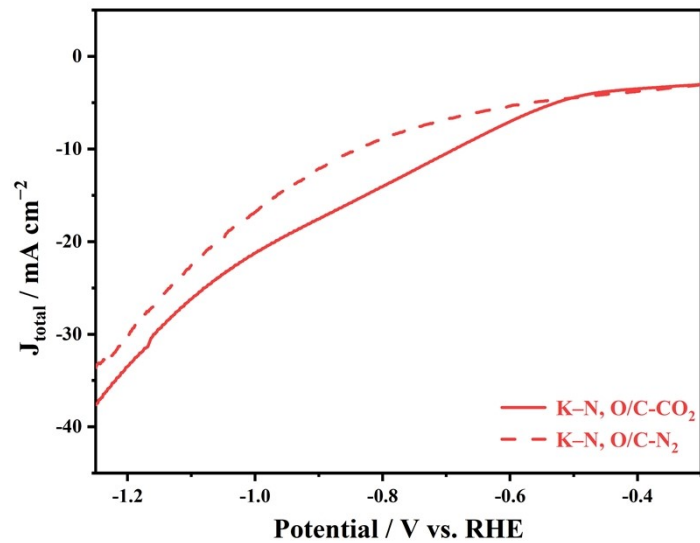

**Fig. S14** LSV curves for K-N, O/C in  $\text{N}_2$  and  $\text{CO}_2$ -saturated 0.5 M  $\text{KHCO}_3$  aqueous solution.

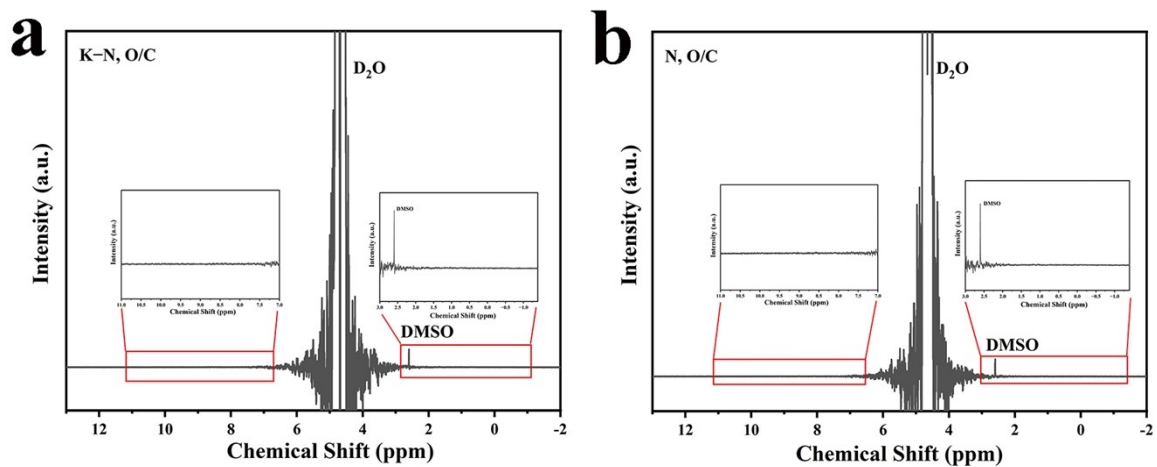

**Fig. S15** Liquid products analysis. <sup>1</sup>H NMR spectrum of the electrolyte after electrolysis using (a) K-N, O/C and (b) N, O/C at -0.6 V vs. RHE, in which the electrolyte was mixed with of D<sub>2</sub>O.

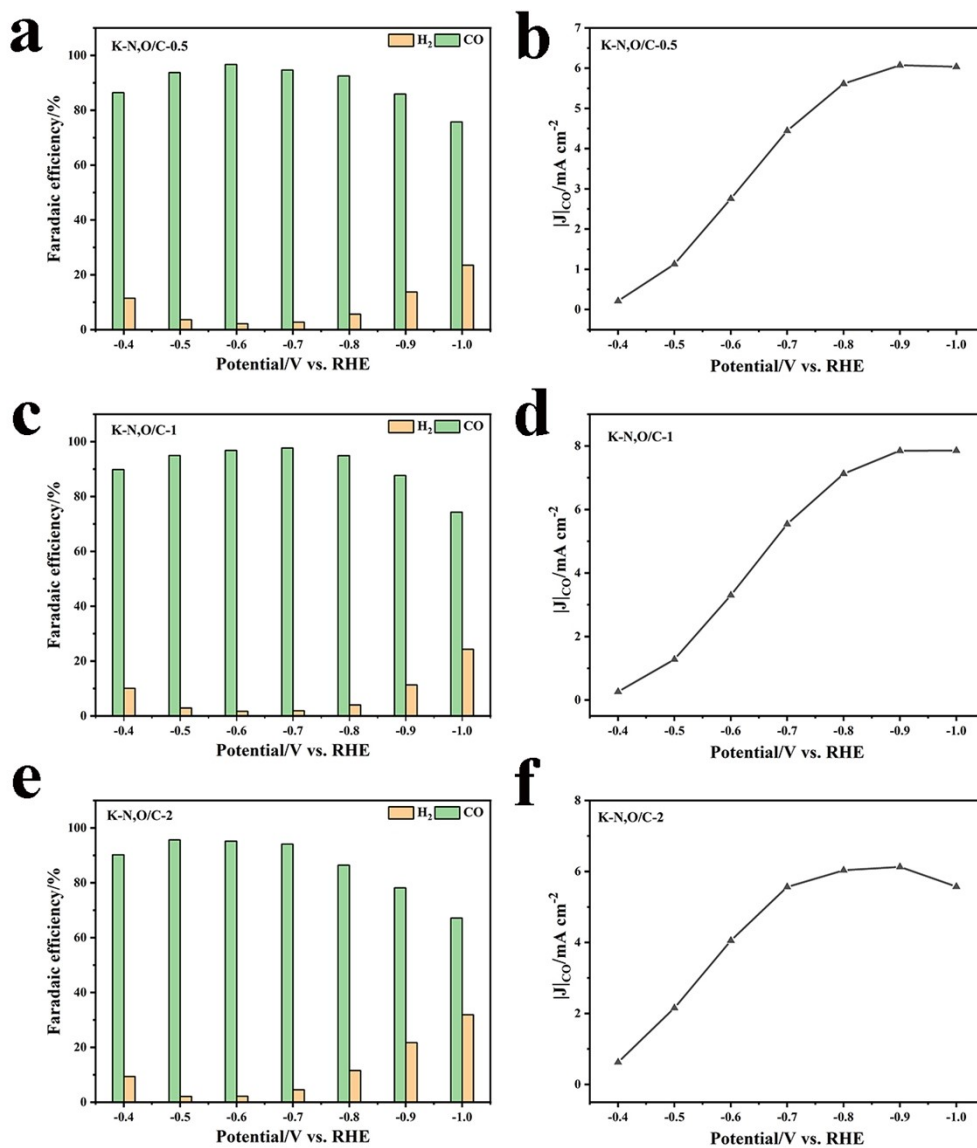

**Fig. S16** (a) the FE of H<sub>2</sub> and CO and (b)  $j_{CO}$  on K-N, O/C-0.5 in CO<sub>2</sub>-saturated 0.5 M KHCO<sub>3</sub>; (c) the FE of H<sub>2</sub> and CO and (d)  $j_{CO}$  on K-N, O/C-1 in CO<sub>2</sub>-saturated 0.5 M KHCO<sub>3</sub>; (e) the FE of H<sub>2</sub> and CO and (f)  $j_{CO}$  on K-N, O/C-2 in CO<sub>2</sub>-saturated 0.5 M KHCO<sub>3</sub>.

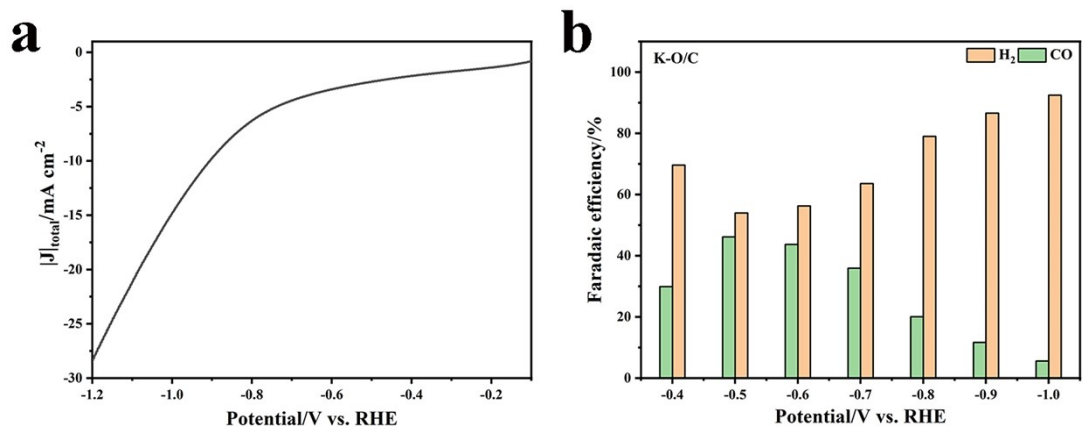

**Fig. S17** (a) the total current density ( $j_{\text{total}}$ ) and (b) FE of  $\text{CO}$  and  $\text{H}_2$  on K-O/C in  $\text{CO}_2$ -saturated  $0.5 \text{ M KHCO}_3$ .

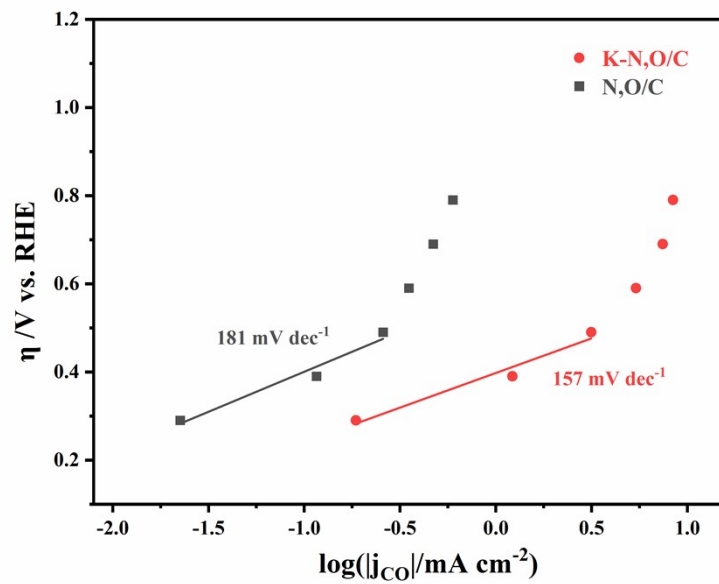

**Fig. S18** Tafel slopes of K-N, O/C and N, O/C.

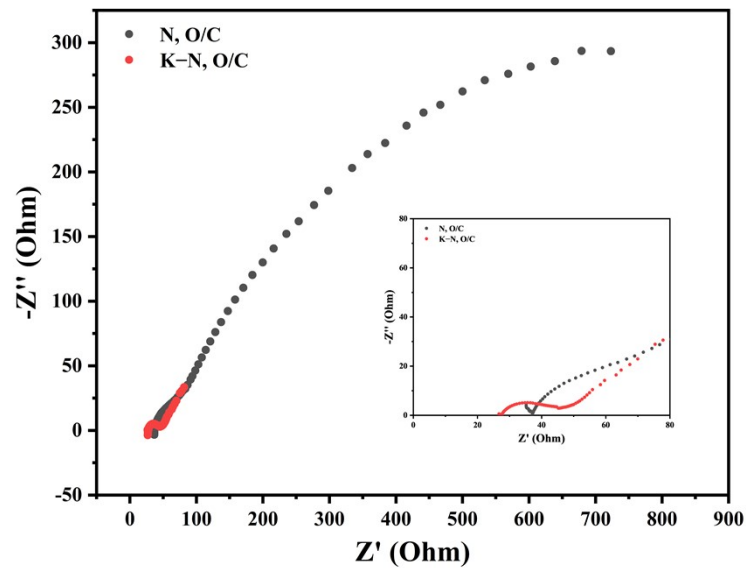

**Fig. S19** Nyquist plots of the impedance spectra of K-N, O/C and N, O/C.



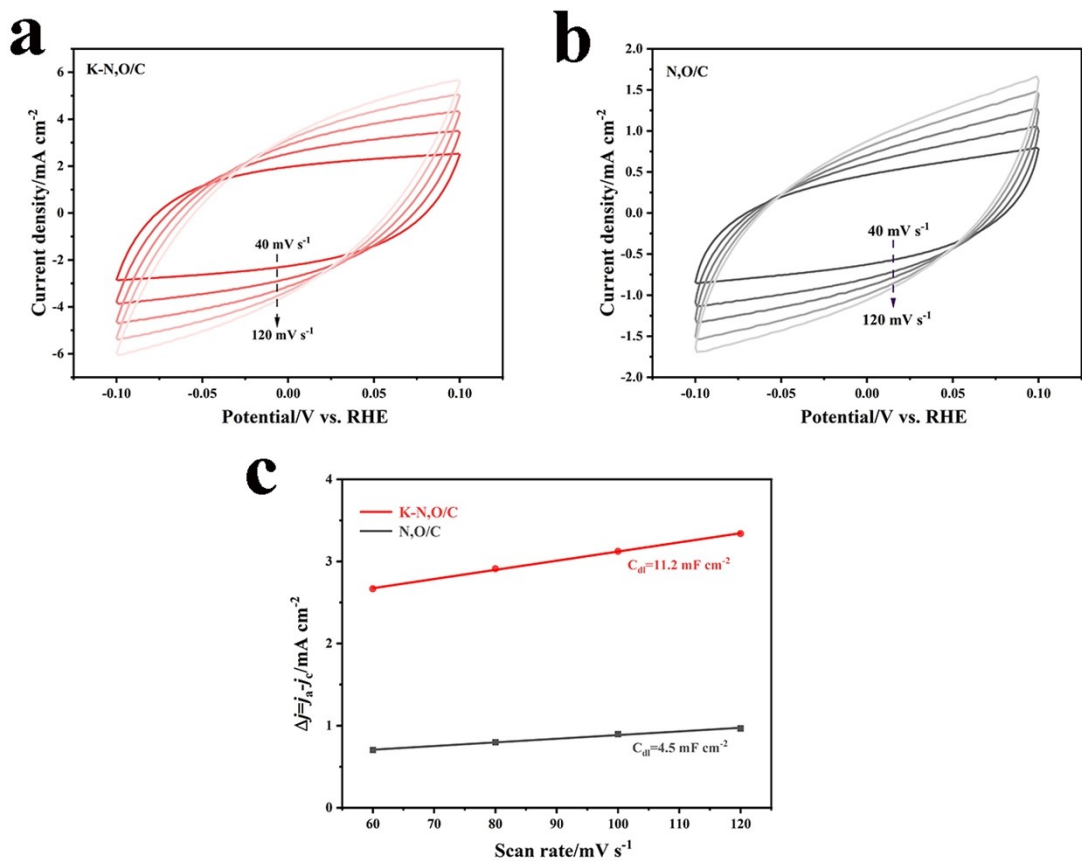

**Fig. S20** Electrochemical surface area (ECSA) measurement for different catalysts. CV curves with different scan rates for determining the double-layer capacitance for the (a) K–N, O/C and (b) N, O/C; the calculated  $C_{\text{dl}}$  values of the (c) K–N, O/C and (d) N, O/C.

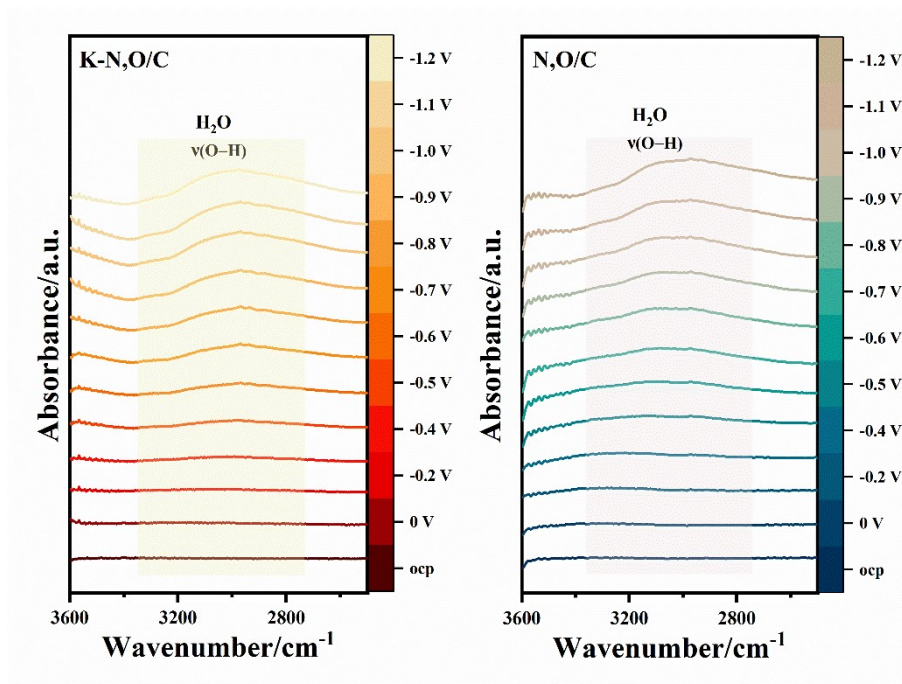

**Fig. S21** In situ ATR-FTIR spectra of K-N, O/C and N, O/C in the high wavenumber region recorded at different applied potentials for CO<sub>2</sub>RR in CO<sub>2</sub>-saturated 0.5 M KHCO<sub>3</sub>.

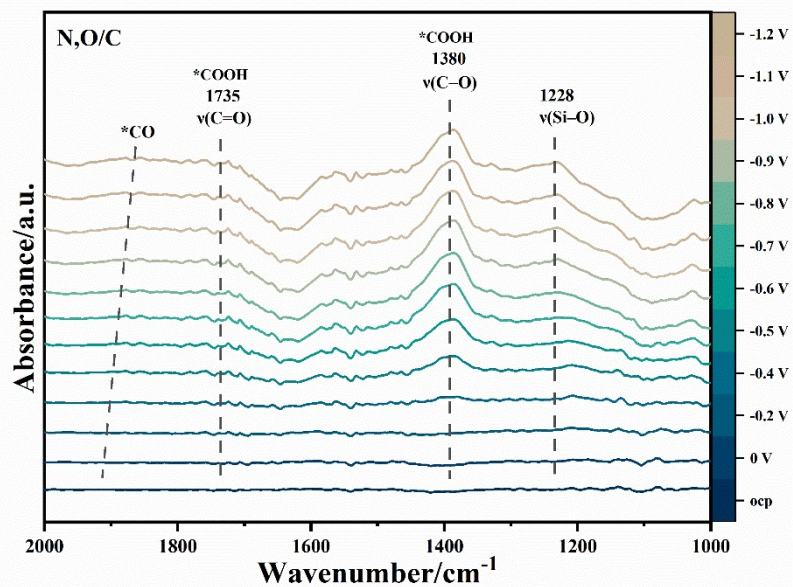

**Fig. S22** In situ ATR-FTIR spectra of N, O/C recorded at different applied potentials for  $\text{CO}_2\text{RR}$  in  $\text{CO}_2$ -saturated 0.5 M  $\text{KHCO}_3$ .

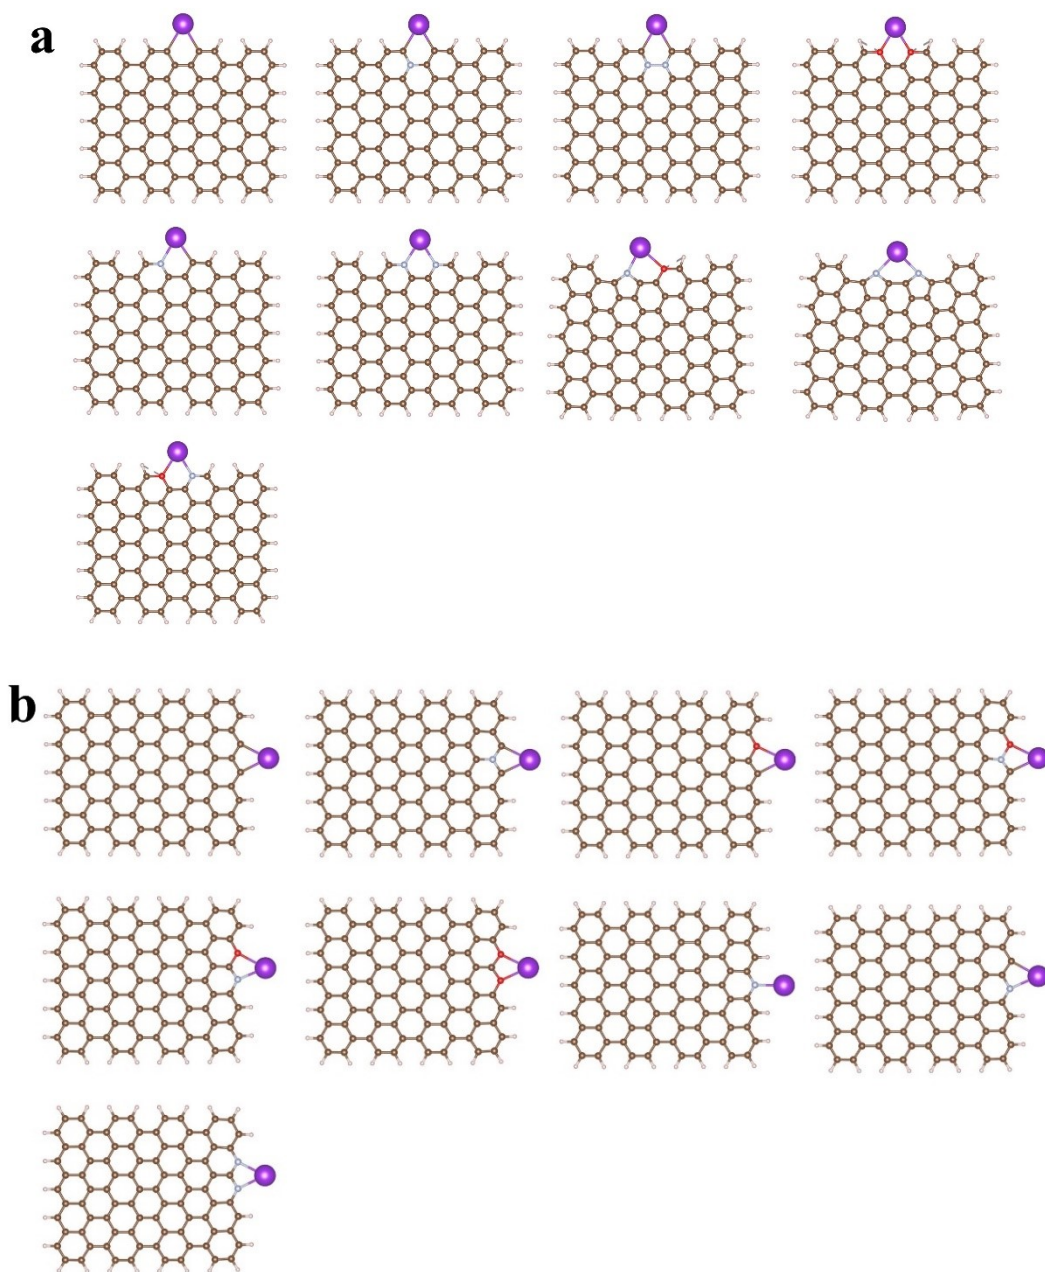

**Fig. S23** (a) The optimized structures with armchair-type edge positions, which in order (from left to right, top to bottom) are labelled as the armchair-type K-C2, K-C2-graphitic-N1, K-C2-graphitic-N2, K-O2, K-pyridinic-N1-C1, K-pyridinic-N2, K-pyrrolic-N1-O1 and K-pyrrolic-N2; (b) The optimized structures with zigzag-type edge positions, which in order (from left to right, top to bottom) are labelled as the zigzag-type K-C2, K-C2-graphitic-N1, K-O1-C1, K-O1-graphitic-N1-C1, K-O1-pyridinic-N1, K-O2, K-pyridinic-N1, K-pyridinic-N1-C1 and K-pyridinic-N2. The purple, brown, blue, red and white balls represent K, C, N, O, and H atoms, respectively.

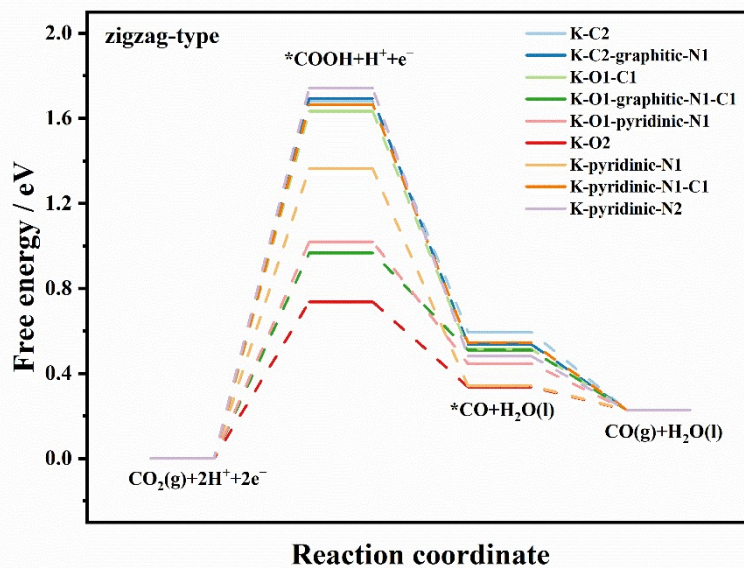

**Fig. S24** Gibbs free energy diagrams of CO<sub>2</sub>RR on the zigzag-type K embedded in graphene frameworks under U=0V versus RHE.

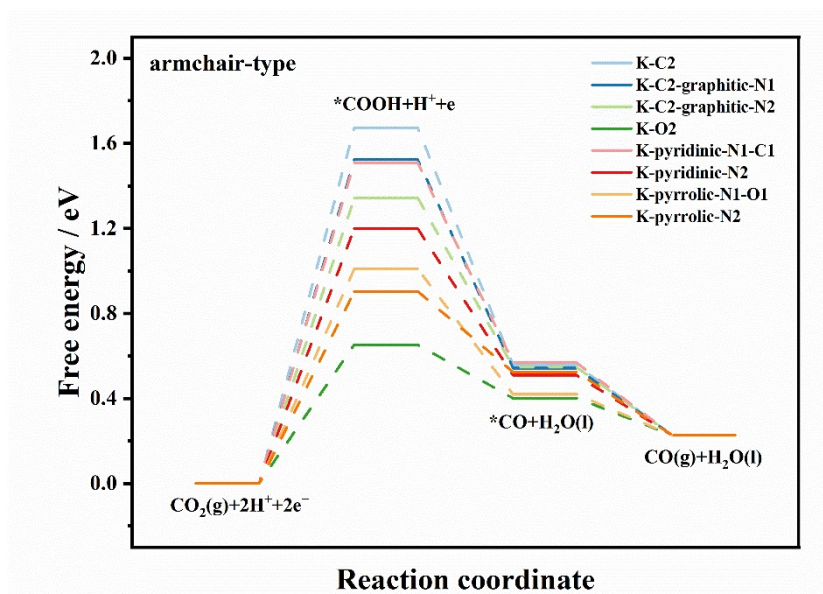

**Fig. S25** Gibbs free energy diagrams of CO<sub>2</sub>RR on the armchair-type K embedded in graphene frameworks under U=0V versus RHE.

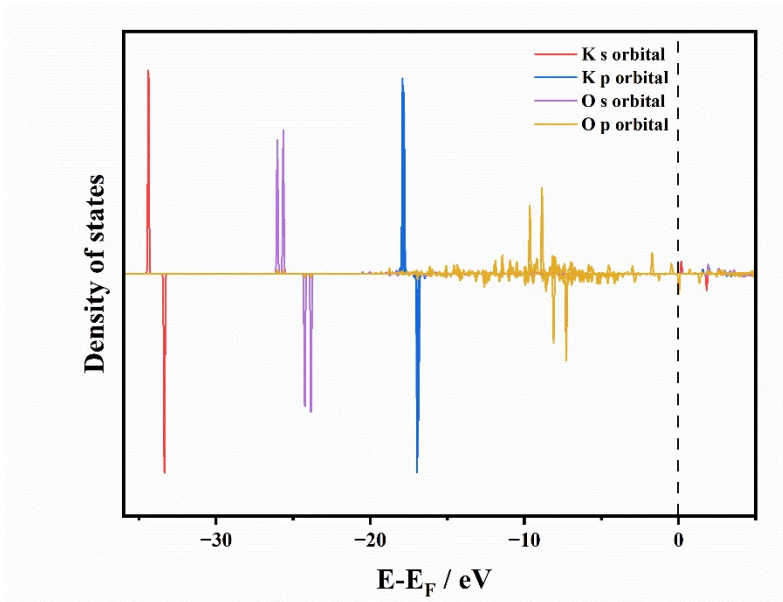

**Fig. S26** The PDOS of K and the coordinated O atoms in the armchair-type K-O2.

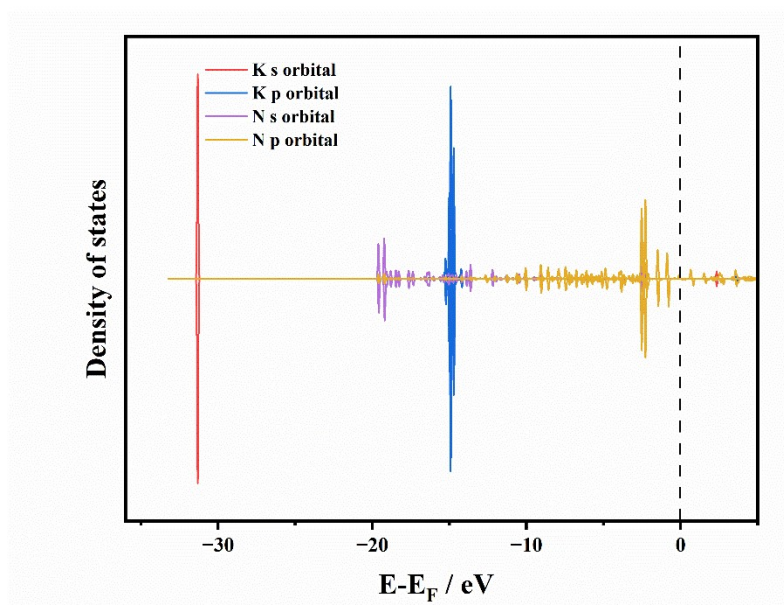

**Fig. S27** The PDOS of K and the coordinated N atoms in the armchair-type K-pyrrolic-N<sub>2</sub>.



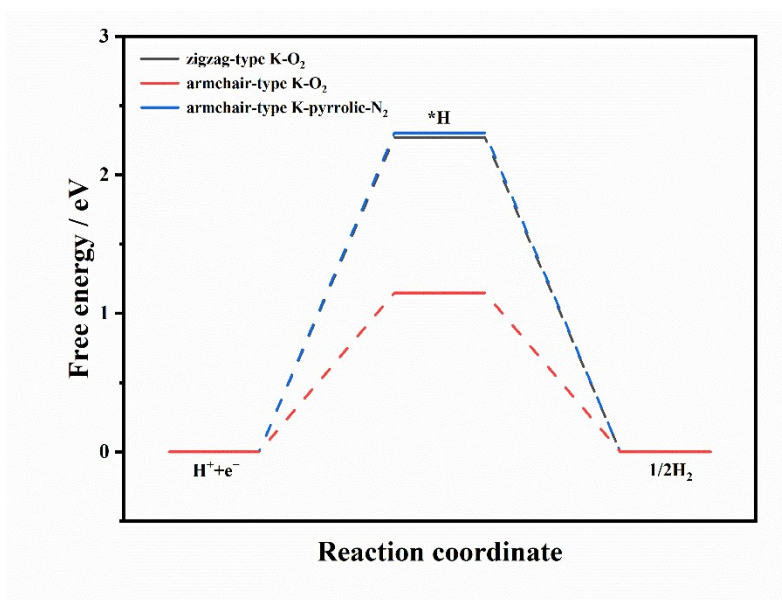

**Fig. S28** Gibbs free energy diagrams of HER on the armchair-type K-O<sub>2</sub> and zigzag-type K-O<sub>2</sub> under U=0V versus RHE.

**Table S1.** The contents of K and Zn of K–N, O/C and N, O/C obtained from ICP-AES.

| Elements (wt. %) | K    | Zn   |
|------------------|------|------|
| K–N, O/C         | 0.81 | 0.3  |
| N, O/C           | 0.06 | 9.22 |

**Table S2.** Summary of the specific surface area and pore diameter of K–N, O/C and N, O/C.

| sample   | BET surface area (m <sup>2</sup> /g) | Average pore diameter (nm) |
|----------|--------------------------------------|----------------------------|
| K–N, O/C | 2296.48                              | 5.12                       |
| N, O/C   | 1090.61                              | 4.33                       |

**Table S3.** The contents of C, N, O of K–N, O/C and N, O/C obtained from XPS.

| Elements (at. %) | C    | N   | O    |
|------------------|------|-----|------|
| K–N, O/C         | 90.4 | 3.4 | 5.8  |
| N, O/C           | 80.6 | 6.0 | 11.9 |

**Table S4.** The reported electrocatalysts for CO<sub>2</sub>RR towards CO in H-cell.

| Catalysts                | Electrolyte<br>(KHCO <sub>3</sub> ) | Potential<br>(V vs. RHE) | FE <sub>CO</sub><br>(%) | J <sub>CO</sub><br>(mA cm <sup>-2</sup> ) | Ref.             |
|--------------------------|-------------------------------------|--------------------------|-------------------------|-------------------------------------------|------------------|
| <b>K-N, O/C</b>          | <b>0.5</b>                          | <b>-0.6</b>              | <b>97.8</b>             | <b>3.15</b>                               | <b>this work</b> |
| Li-N, O/C                | 0.5                                 | -0.5                     | 98.8                    | 2.12                                      | 4                |
| Ni-N-C SAC               | 0.5                                 | -0.65                    | 97                      | ~10                                       | 5                |
| Bi-SAs-N/C               | 0.5 M                               | -0.7                     | 93.2                    | 4.93                                      | 6                |
| FeN <sub>4</sub> Cl/NC   | 0.5 M                               | -0.6                     | 90.5                    | 10.8                                      | 7                |
| DPC-NH <sub>3</sub> -950 | 0.1 M                               | -0.6                     | 95.2                    | 2.84                                      | 8                |
| Sn-NOC                   | 0.1 M                               | -0.7                     | 94                      | 13.9                                      | 9                |
| Fe-N-P-C                 | 0.5 M                               | -0.34                    | 98                      | 0.8                                       | 10               |
| CuN <sub>3</sub> O/C     | 0.5 M                               | -0.8                     | 96                      | 1.8                                       | 11               |
| Zn-NS-C                  | 0.5 M                               | -0.5                     | 96                      | 5.2                                       | 12               |
| CNS-NiSA                 | 0.5 M                               | -0.8                     | 95                      | 7.8                                       | 13               |

## REFERENCES

- 1 M. Huang, S. Gong, C. Wang, Y. Yang, P. Jiang, P. Wang, L. Hu and Q. Chen, *Angew. Chem. Int. Ed.*, 2021, **60**, 23002–23009.
- 2 G. Kresse and J. Hafner, *Phys. Rev. B*, 1993, **47**, 558–561.
- 3 P. E. Blöchl, *Phys. Rev. B*, 1994, **50**, 17953–17979.
- 4 H. Huang, S. Chen, P. Jiang, Y. Yang, C. Wang, W. Zheng, Z. Cheng, M. Huang, L. Hu and Q. Chen, *Adv. Funct. Mater.*, 2023, **33**, 2300475.
- 5 J. Wang, Y.-C. Huang, Y. Wang, H. Deng, Y. Shi, D. Wei, M. Li, C.-L. Dong, H. Jin, S. S. Mao and S. Shen, *ACS Catal.*, 2023, **13**, 2374–2385.
- 6 Z. Wang, C. Wang, Y. Hu, S. Yang, J. Yang, W. Chen, H. Zhou, F. Zhou, L. Wang, J. Du, Y. Li and Y. Wu, *Nano Res.*, 2021, **14**, 2790–2796.
- 7 Z. Li, R. Wu, S. Xiao, Y. Yang, L. Lai, J. S. Chen and Y. Chen, *Chem. Eng. J.*, 2022, **430**, 132882.
- 8 Y. Dong, Q. Zhang, Z. Tian, B. Li, W. Yan, S. Wang, K. Jiang, J. Su, C. W. Oloman, E. L. Gyenge, R. Ge, Z. Lu, X. Ji and L. Chen, *Adv. Mater.*, 2020, **32**, 2001300.
- 9 J. Guo, W. Zhang, L. Zhang, D. Chen, J. Zhan, X. Wang, N. R. Shiju and F. Yu, *Adv. Sci.*, 2021, **8**, 2102884.
- 10 K. Li, S. Zhang, X. Zhang, S. Liu, H. Jiang, T. Jiang, C. Shen, Y. Yu and W. Chen, *Nano Lett.*, 2022, **22**, 1557–1565.
- 11 P. Song, B. Hu, D. Zhao, J. Fu, X. Su, W. Feng, K. Yu, S. Liu, J. Zhang and C. Chen, *ACS Nano*, 2023, **17**, 4619–4628.
- 12 W. Zheng, D. Wang, W. Cui, X. Sang, X. Qin, Z. Zhao, Z. Li, B. Yang, M. Zhong, L. Lei, Q. Zheng, S. Yao, G. Wu and Y. Hou, *Energy Environ. Sci.*, 2023, **16**, 1007–1015.
- 13 X. Zhao, S. Huang, Z. Chen, C. Lu, S. Han, C. Ke, J. Zhu, J. Zhang, D. Tranca and X. Zhuang, *Carbon*, 2021, **178**, 488–496.
